# Supplementary material
Source: PubMed Central journal article supplement (PMC3811187)
Supplement: AEM.02551-13_zam999104782so1.pdf [file AEM.02551-13_zam999104782so1.pdf]

1 **Supplementary material**

2 **U(VI) Reduction by a Diversity of Outer Surface C-Type Cytochromes of *Geobacter***  
3 ***sulfurreducens***

4

5 Roberto Orellana<sup>a</sup>, Janet J. Leavitt<sup>b</sup>, Luis R. Comolli<sup>c</sup>, Roseann Csencsits<sup>c</sup>, Noemie  
6 Janot<sup>d</sup>, Kelly A. Flanagan<sup>a</sup>, Arianna S. Gray<sup>a</sup>, Ching Leang<sup>a</sup>, Mounir Izallalen<sup>a</sup>, Tünde  
7 Mester<sup>a</sup> and Derek R. Lovley<sup>a</sup>

8 <sup>a</sup> *Department of Microbiology, University of Massachusetts, Amherst, MA 01003;* <sup>b</sup>

9 *Department of Civil Engineering, University of New Mexico, Albuquerque, NM 87106;*

10 <sup>c</sup> *Life Sciences Division, Lawrence Berkeley National Laboratory, Berkeley, CA 94720;*

11 <sup>d</sup> *SLAC National Accelerator Laboratory, Menlo Park, CA94025*

12

13

14 **Table S1: Strains used in this study.**

| Strain name       | Deleted or modified gene(s)      | Genbank accession number of deleted or modified gene(s)         | Localization | Reference |
|-------------------|----------------------------------|-----------------------------------------------------------------|--------------|-----------|
| $\Delta$ omcST    | omcS; omcT is also not expressed | GI-39997599                                                     | OM           | (1)       |
| $\Delta$ omcZ     | omcZ                             | GI-39997174                                                     | OM           | (2)       |
| $\Delta$ pilA     | pilA                             | GI-39996596                                                     | OM           | (3)       |
| $\Delta$ pilA::cm | -                                | -                                                               | -            | (3)       |
| $\Delta$ BSTE     | omcB, omcS, omcT, omcE           | GI-39997831, GI-39997599, GI-39997598, GI-39995725              | OM           | (4)       |
| $\Delta$ BSTEZ    | omcB, omcS, omcT, omcE, omcZ     | GI-39997831, GI-39997599, GI-39997598, GI-39995725, GI-39997174 | OM           | (4)       |

|                |                                                                                                         |             |   |     |
|----------------|---------------------------------------------------------------------------------------------------------|-------------|---|-----|
| $\Delta$ aro-5 | Alanine was substituted for each of the five aromatic amino acids in the carboxyl terminus of pilA gene | GI-39996596 | C | (5) |
|----------------|---------------------------------------------------------------------------------------------------------|-------------|---|-----|

15

16

17

18

19

20

21

22

23

24

25

26

27

28

29

30

31 **Figure S1: CryoTEM images of (A) wild-type, (B)  $\Delta$ BESTZ, and (C)  $\Delta$ pilA cells**  
32 **respiring U(VI).** The cell walls and high contrast aggregates were discussed in the  
33 context of Fig. 6. We clearly see normal pili distribution in wild type, high abundance of  
34 pili in cells of  $\Delta$ BESTZ, and no pili in  $\Delta$ pilA. Insets show magnified views of small  
35 regions within blue boxes for enhanced view.

36

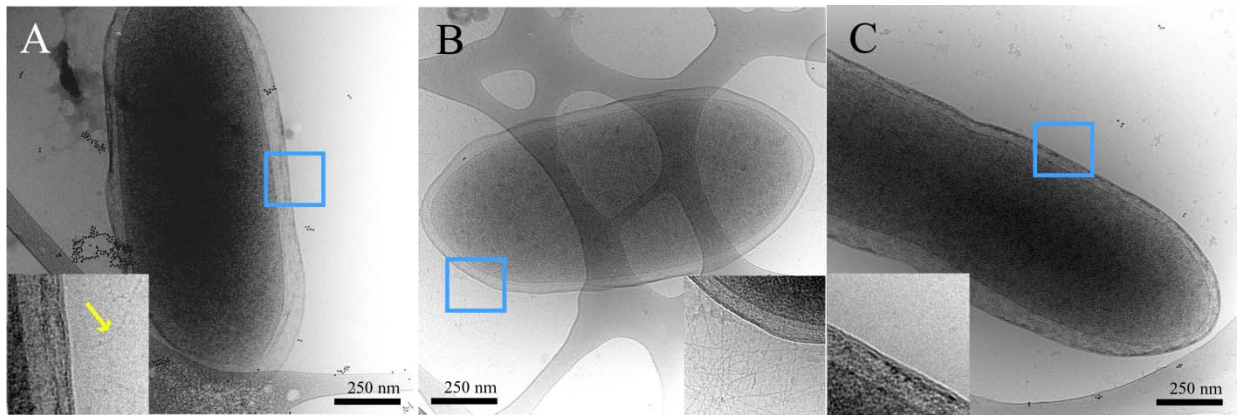

49 **Figure S2: Cryo-ET of  $\Delta pilA$  cells respiring U(VI).** A) Slice through a 3D cryo-ET  
50 reconstruction of an intact cell in vitreous ice. The high contrast encasing/spanning the  
51 OM is consistent with U deposition, the only high atomic number element (very “electron  
52 dense”) added to the cultures. IM: inner membrane; OM: outer membrane; Grid: carbon  
53 coated Formvar support. Pink arrows: aggregates at OM and IM. B) Slice through a 3D  
54 cryo-ET of another cell with. The isosurface rendering in 3D of a region of the high  
55 contrast aggregates is shown in dark pink, superimposed on a slice of the same cryo-ET  
56 reconstruction in grey-scale. The yellow box outlines the 3D isosurface sub-volume. See  
57 XEDS line scans across the cell surface and cell wall in **Figure 7B** unequivocally  
58 identifying the aggregates as U. Scale: the width of the periplasmic space is  
59 approximately 30 nm.

60  
61

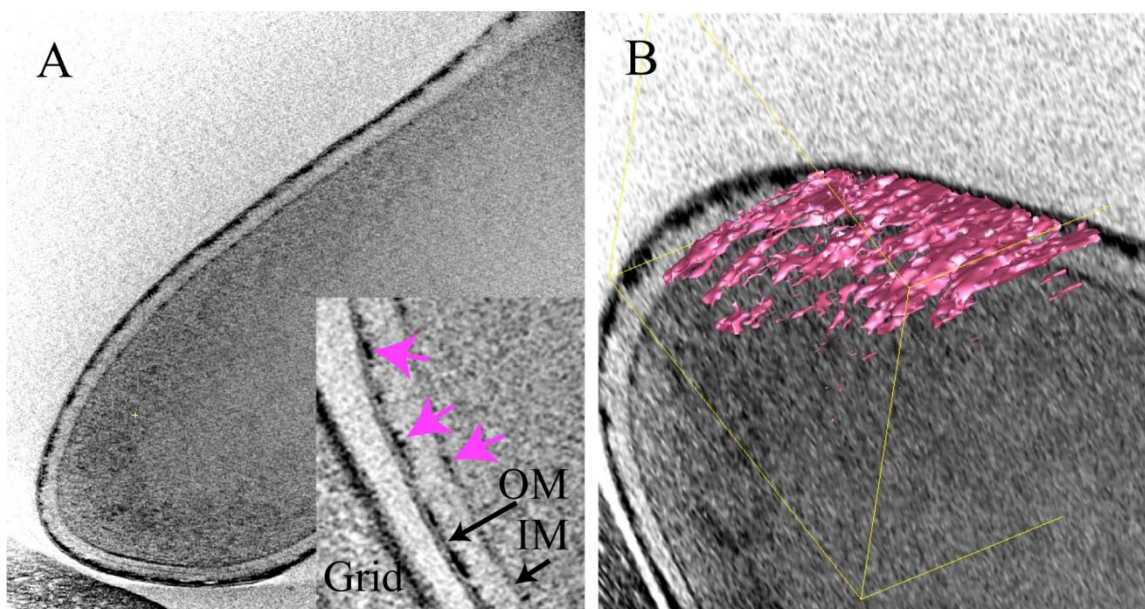

65 **References**

66

- 67 1. **Mehta T, Coppi MV, Childers SE, Lovley DR.** 2005. Outer membrane c-type  
68 cytochromes required for Fe(III) and Mn(IV) oxide reduction in *Geobacter*  
69 *sulfurreducens*. Appl Environ Microb **71**:8634-8641.
- 70 2. **Nevin KP, Kim BC, Glaven RH, Johnson JP, Woodard TL, Methe BA,**  
71 **DiDonato RJ, Covalla SF, Franks AE, Liu A, Lovley DR.** 2009. Anode Biofilm  
72 Transcriptomics Reveals Outer Surface Components Essential for High  
73 Density Current Production in *Geobacter sulfurreducens* Fuel Cells. Plos One  
74 **4**.
- 75 3. **Reguera G, McCarthy KD, Mehta T, Nicoll JS, Tuominen MT, Lovley DR.**  
76 2005. Extracellular electron transfer via microbial nanowires. Nature  
77 **435**:1098-1101.
- 78 4. **Voordeckers JW, Kim BC, Izallalen M, Lovley DR.** 2010. Role of *Geobacter*  
79 *sulfurreducens* Outer Surface c-Type Cytochromes in Reduction of Soil Humic  
80 Acid and Anthraquinone-2,6-Disulfonate. Appl Environ Microb **76**:2371-  
81 2375.
- 82 5. **Vargas M, Malvankar NS, Tremblay P-L, Leang C, Smith JA, Patel P,**  
83 **Synoeenbos-West O, Nevin KP, Lovley DR.** 2013. Aromatic Amino Acids  
84 Required for Pili Conductivity and Long-Range Extracellular Electron  
85 Transport in *Geobacter sulfurreducens*. mBio **4**.

86

87
